# Supplementary material for: A circadian clock regulates efflux by the blood-brain barrier in mice and human cells
Source: PubMed Central journal article supplement (PMC7841146; doi:10.1038/s41467-020-20795-9), 2021-01-27
Supplement: 41467_2020_20795_MOESM5_ESM.pdf [file 41467_2020_20795_MOESM5_ESM.pdf]

## Description of Additional Supplementary Files

### **Title: Supplementary Dataset 1.**

**Description: Total read counts of Bmal1wt and Bmal1mut brain endothelial cells (BECs).** Brains from control or endothelial-cell Bmal1-deficient mice were collected at ZT2, ZT6, ZT10, ZT14, ZT18, and ZT22 (n=12; 6 time points, 2 independent experiments). BECs were isolated by FACS using CD31 antibody. RNA was extracted and sequenced with HiSeq.

### **Title: Supplementary Dataset 2.**

**Description: Cycling genes in Bmal1wt brain endothelial cells (BECs).** RNA-sequencing from control BECs collected at ZT2, ZT6, ZT10, ZT14, ZT18, and ZT22 analyzed by Meta2d analysis for 24-hour cycling.

### **Title: Supplementary Dataset 3.**

**Description: Cycling genes in Bmal1mut brain endothelial cells (BECs).** RNA-sequencing from Bmal1<sup>fl/fl</sup>; Tie2<sup>cre</sup> BECs collected at ZT2, ZT6, ZT10, ZT14, ZT18, and ZT22 analyzed by Meta2d analysis for 24-hour cycling.
